# Supplementary material
Source: Research Square preprint supplement (doi:10.21203/rs.3.rs-9292460/v1)
Supplement: Supplementary file 1 [file 213fcc22877537c0ebdefb58.docx]

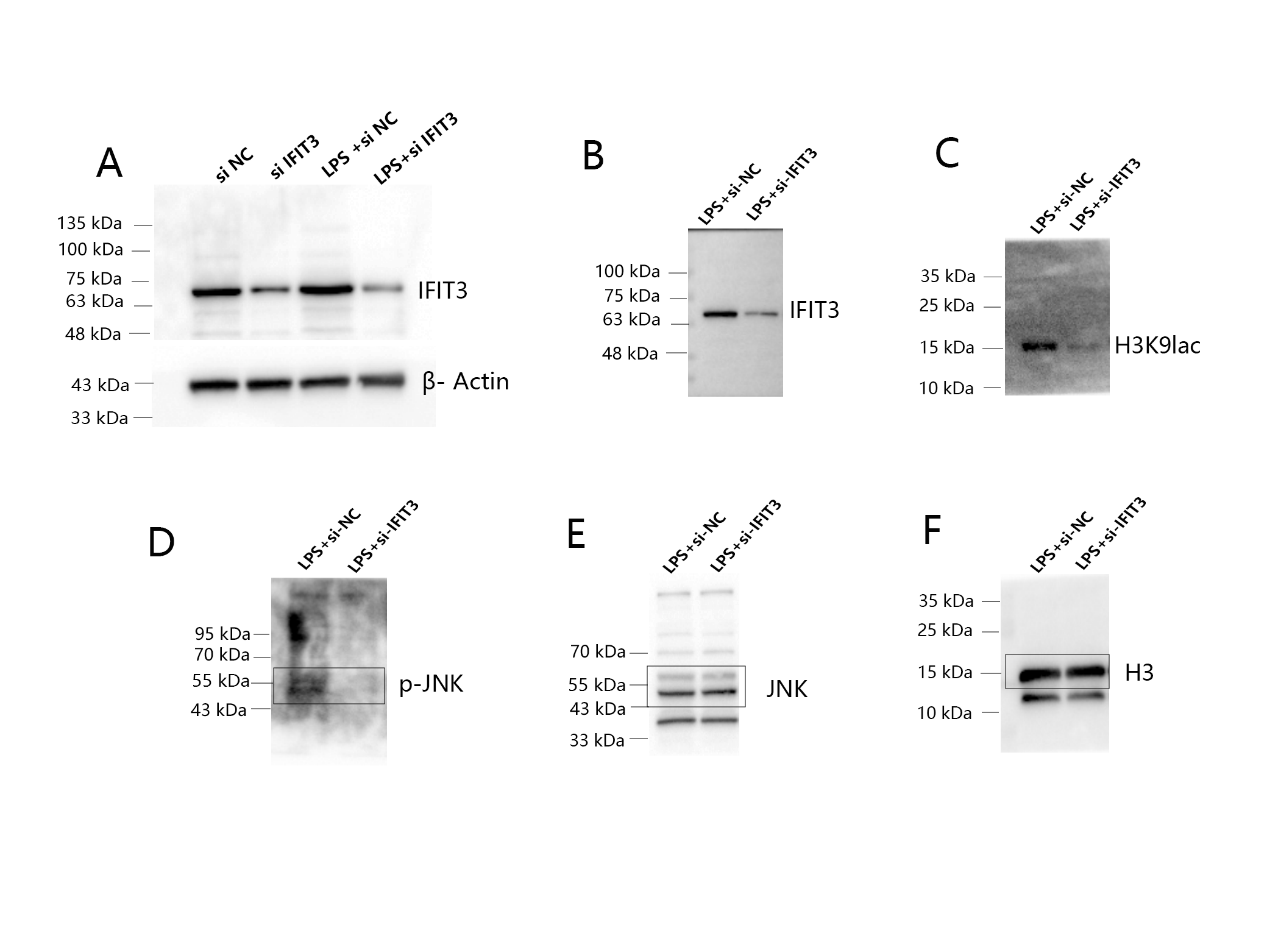


**Figure S1.** Western blot analysis of target proteins in different groups of RAW264.7 cells. Panel **A** corresponds to Figure 4A, and panels **B–F** correspond to Figure 4C. Data are representative of three independent biological experiments; statistical analysis corresponds to that described in the legend of Figure 4.


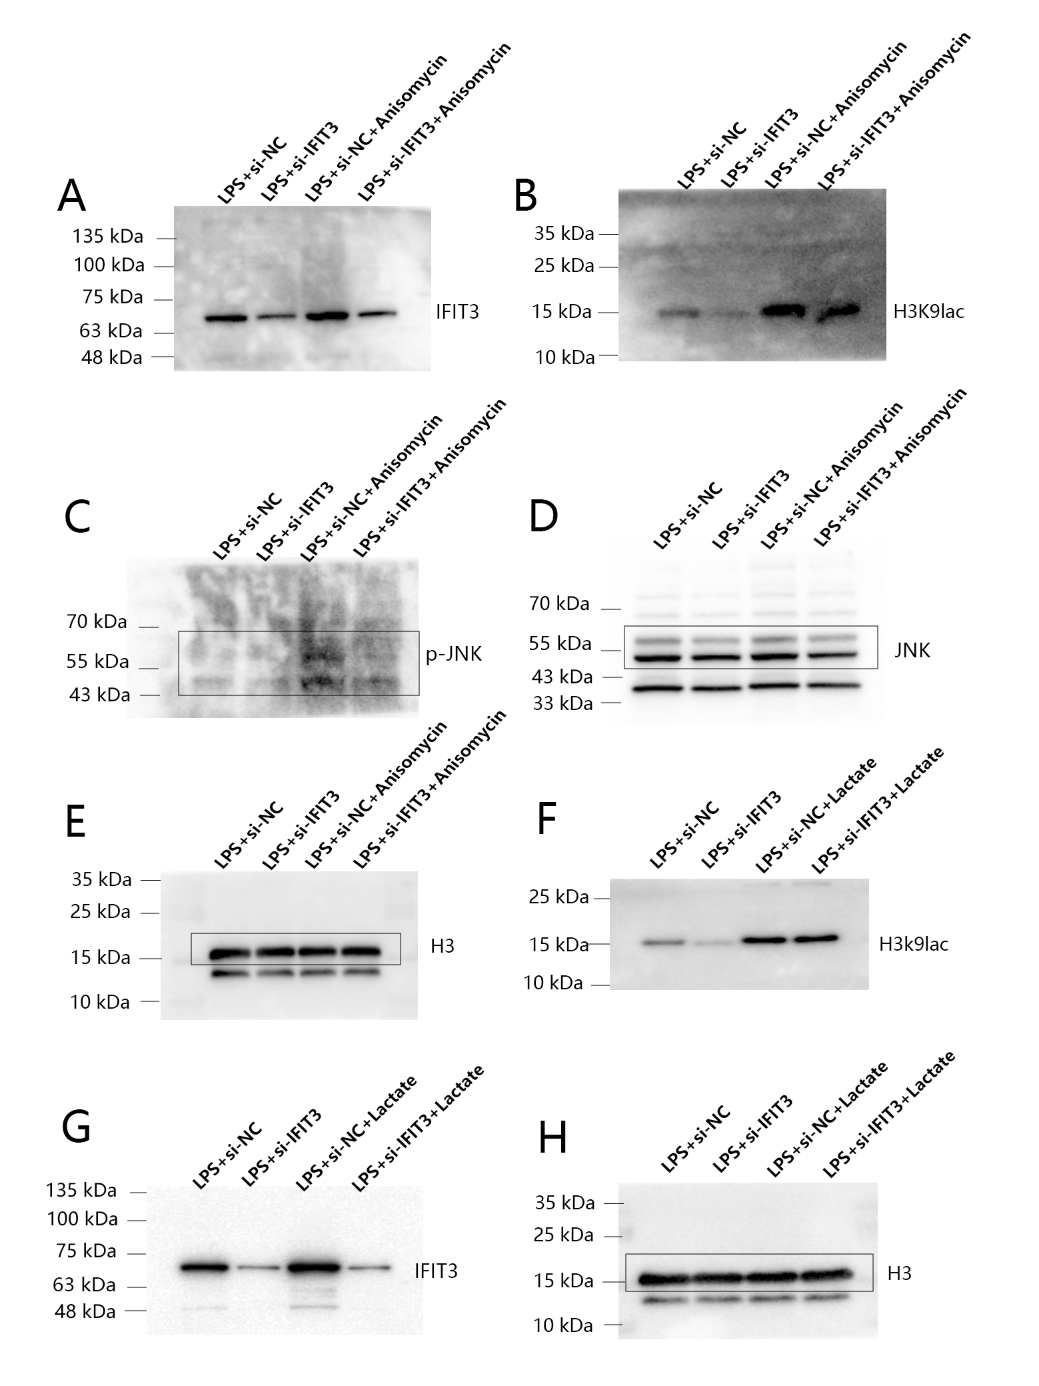


**Figure S2.** Western blot analysis of target proteins in different groups of RAW264.7 cells. Panels **A–E** correspond to Figure 5A, and panels **F–H** correspond to Figure 5C. Data are representative of three independent biological experiments; statistical analysis corresponds to that described in the legend of Figure 5.
